## Title:

DASH diet, Reduced Rank Regression Dietary Patterns and relations with kidney function in the CHRIS general population study

## Authors:

Giulia Barbieri<sup>1,2</sup>  (orcid: [0000-0002-3531-0725](https://orcid.org/0000-0002-3531-0725)), Vanessa Garcia-Larsen<sup>3</sup> (orcid: [0000-0002-0003-1988](https://orcid.org/0000-0002-0003-1988)), Rebecca Lundin<sup>1</sup> (orcid: [0000-0002-8380-4834](https://orcid.org/0000-0002-8380-4834)), Ryosuke Fujii<sup>4</sup> (orcid: [0000-0003-1730-2059](https://orcid.org/0000-0003-1730-2059)), Pietro Manuel Ferraro<sup>5</sup> (orcid: [0000-0002-1379-022X](https://orcid.org/0000-0002-1379-022X)), Giovanni Gambaro<sup>5</sup> (orcid: [0000-0001-5733-2370](https://orcid.org/0000-0001-5733-2370)), Roberto Melotti<sup>1</sup> (orcid: [0000-0003-4115-317X](https://orcid.org/0000-0003-4115-317X)), Martin Gögele<sup>1</sup> (orcid: [0000-0003-4785-4348](https://orcid.org/0000-0003-4785-4348)), Lucia Cazzoletti<sup>2</sup> (orcid: [0000-0002-1429-6282](https://orcid.org/0000-0002-1429-6282)), Peter P Pramstaller<sup>1</sup> (orcid: [0000-0002-9831-8302](https://orcid.org/0000-0002-9831-8302)), Maria Elisabetta Zanolin<sup>2</sup> (orcid: [0000-0003-3021-2269](https://orcid.org/0000-0003-3021-2269)), Cristian Pattaro<sup>1</sup> (orcid: [0000-0002-4119-0109](https://orcid.org/0000-0002-4119-0109)), Essi Hantikainen<sup>1</sup>  (orcid: [0000-0002-4155-2894](https://orcid.org/0000-0002-4155-2894))

## Affiliations

1. Institute for Biomedicine, Eurac Research, Bolzano/Bozen, Italy
2. Unit of Epidemiology and Medical Statistics, Department of Diagnostics and Public Health, University of Verona, Verona, Italy
3. Department of International Health, The Johns Hopkins Bloomberg School of Public Health, Baltimore, US
4. Department of Preventive Medical Sciences, Fujita Health University School of Medical Sciences, Toyoake, Japan
5. Division of Nephrology, Department of Medicine, University of Verona, Verona, Italy

## Corresponding authors

Giulia Barbieri  
Eurac Research, Institute for Biomedicine  
Via Volta, 21 – 39100 Bolzano, Italy  
Tel. +39 0471 055 797  
[giulia.barbieri@eurac.edu](mailto:giulia.barbieri@eurac.edu)

Essi Hantikainen  
Eurac Research, Institute for Biomedicine  
Via Volta, 21 – 39100 Bolzano, Italy  
Tel. +39 0471 055 477  
[essimarjatta.hantikainen@eurac.edu](mailto:essimarjatta.hantikainen@eurac.edu)

## **Acknowledgements**

CHRIS Study investigators thank all study participants, the Healthcare System of the Autonomous Province of Bolzano-South Tyrol, and all Eurac Research staff involved in the study ([CHRIS acknowledgements - Eurac Research](#)) Bioresource Impact Factor Code: BRIF6107. The authors thank the Department of Innovation, Research University and Museums of the Autonomous Province of Bozen/Bolzano for covering the Open Access publication costs.

## **Financial Disclosure Statement**

The CHRIS Study was funded by the Autonomous Province of Bolzano-South Tyrol - Department of Innovation, Research, University and Museums and supported by the European Regional Development Fund (FESR1157). This work was funded through a Eurac Research Head Office funded the PhD scholarship, established in collaboration with University of Verona.

## **Data availability statement**

Data and samples can be requested for clearly defined research via the CHRIS Portal ([CHRIS Portal - Eurac Research](#)).

## **Ethics approval and consent to participate**

The Ethics Committee of the Healthcare System of the Autonomous Province of Bolzano-South Tyrol approved the CHRIS baseline protocol on 19 April 2011 (21-2011). The study conforms to the Declaration of Helsinki, and with national and institutional legal and ethical requirements. All participants included in the analysis gave written informed consent.

### **CRedit author statement:**

**Giulia Barbieri:** Conceptualization, Investigation, Data curation, Formal analysis, Methodology, Visualization, Writing - Original Draft; **Vanessa Garcia-Larsen:** Conceptualization, Writing - Original Draft; **Rebecca Lundin:** Methodology, Writing - Original Draft; **Ryosuke Fujii:** Methodology, Writing - Original Draft; **Pietro Manuel Ferraro:** Methodology, Writing - review & editing; **Giovanni Gambaro:** Methodology, Writing - review & editing; **Roberto Melotti:** Methodology, Writing - review & editing; **Martin Gögele:** Data curation, Writing - review & editing; **Lucia Cazzoletti:** Conceptualization, Writing - review & editing

**Peter P Pramstaller:** Funding acquisition, Writing - review & editing; **Maria Elisabetta Zanolin:** Funding acquisition, Conceptualization, Writing - review & editing; **Cristian Pattaro:** Conceptualization, Funding acquisition, Supervision, Writing - Original Draft; **Essi Hantikainen:** Conceptualization, Methodology, Investigation, Supervision, Writing - Original Draft

### **Competing Interest Statement:**

CP is consultant for Quotient Therapeutics. PMF received consultant fees and grants or other support from Allena Pharmaceuticals, Alnylam, Amgen, AstraZeneca, Bayer, Gilead, Novo Nordisk, Otsuka Pharmaceuticals, Rocchetta, Vifor Fresenius, and royalties as an author for UpToDate. All other authors declared no conflict of interest.

## Abstract

**Objective:** We assessed dietary patterns (DPs) using the pre-defined Dietary Approaches to Stop Hypertension (DASH) score and reduced rank regression (RRR) to evaluate their association with estimated glomerular filtration rate (eGFR) in a general population sample.

**Methods:** We analysed cross-sectional data from 6,133 healthy adult participants of the Cooperative Health Research In South Tyrol (CHRIS) study. Using self-reported food frequency questionnaire data, we derived the DASH-score and two RRR-based sex-specific DP-scores based on nine cardio-renal-metabolic parameters. We fitted sex-stratified linear and non-linear models to assess associations with creatinine-based eGFR.

**Results:** Males with higher intake of cereals, whole grains, sugar, fruits, and legumes, and lower intake of beer, and red and processed meat (MDP<sub>1</sub>), exhibited higher eGFR levels. Coherently, high adherence to the DASH-style diet was associated with higher eGFR. In females, the associations varied by menstrual status. Among those with ceased menstruation, a low intake of meat, spirits, refined grains, beer, and fish, and a high intake of whole grains and dairy products was associated with higher eGFR. In females still experiencing regular menstruation, a high intake of beef, nuts, beer, legumes, fish, and coffee, and low intake of refined grains, (FDP<sub>2</sub>) was associated with lower eGFR. No association was observed with the DASH score in females.

**Conclusion:** Our findings confirm the DASH-style diet is associated with better kidney function in males, but not in females. By identifying sex-specific kidney function-oriented DPs, the RRR approach provides new insights into the diet-eGFR relation, highlighting in addition potential effect modification by menstrual status.

## Keywords

CHRIS study; Dietary Patterns; Chronic Kidney Disease; Reduced Rank Regression; Kidney function; Food Frequency Questionnaire, Diet, DASH diet

## Introduction

Already affecting approximately 10% of the global adult population, chronic kidney disease (CKD) has become a major public health concern.[1] The increasing prevalence of chronic conditions like diabetes, cardiovascular disease (CVD), and hypertension, alongside population aging, are the most recognized factors contributing to the growing CKD burden.[2] Prevention is thus fundamental to reduce exposure to avoidable risk factors.[3]

Given the substantial overlap between CVD and CKD, lifestyle recommendations often coincide, particularly with regard to dietary habits. The Dietary Approach to Stop Hypertension (DASH) Diet has been specifically designed to prevent and manage high blood pressure by recommending a high intake of grains, fruits, vegetables, and low-fat dairy, while limiting the consumption of meat, fats, and sweets. General population studies suggest a protective association between adherence to DASH diet and risk of CKD onset and progression.[4, 5] The DASH diet has further been recommended by the National Institute of Diabetes and Digestive and Kidney Diseases as well as the National Kidney Foundation for non-dialytic CKD patients to improve kidney health.[6] Nevertheless, the pathophysiological role of diet and its components in kidney function is not yet fully ascertained. Further research is required to assess the relevance of these findings with regards to primary prevention of CKD.

The DASH diet excels in its established health benefits and broad applicability, allowing for consistent comparison across populations. However, in population studies, assessing adherence to predefined dietary indices may not always accurately capture specific dietary habits of individual populations as they consider only specific aspects of the diet, often leading to unclear interpretation of intermediate scores characterized by more complex nutritional compositions and dietary patterns (DPs).[7] In contrast, hybrid methods, such as Reduced Rank Regression (RRR), have emerged as useful exploratory approaches as they implement prior knowledge of the diet-disease pathway and allow identification of population-specific DPs, by considering the overall diet, associated with disease risk.[8, 9] Despite the increased complexity of interpretation and limited reproducibility in external studies, a hybrid approach offers flexibility in dietary pattern analysis compared to standard hypothesis-based dietary indices. This is particularly relevant in the context of CKD prevention, where ad hoc dietary scores have not yet been established and validated.

To date, only two studies have applied RRR in relation to kidney health using biomarkers as mediators. Cai et al. applied RRR to investigate associations between eGFR-based DPs and eGFR decline or incident CKD in a CKD-free large population-based cohort.[10] Kurniawan et al. derived RRR based DPs implementing a broader set of CKD-related risk biomarkers as mediators and investigated association

with severity of impaired kidney function in population based study among participants with CKD.[11] Moreover, no formal comparison between DASH-like scores and RRR-like methods have been conducted. With the aim of gaining a complementary and comprehensive understanding of the role of diet and its association with eGFR, we compared the effects of the DASH diet score (DASH-score) with those of DPs specifically derived from RRR for risk factors of reduced estimated glomerular filtration rate (eGFR), the primary marker of kidney function. The analysis was conducted in a large and generally healthy population sample.

## Methods

### *Study design*

Analyses were conducted within the Cooperative Health Research in South Tyrol (CHRIS) study, a population-based study that recruited 13,393 adults from the Vinschgau/Val Venosta district (South Tyrol, Italy) between 2011 and 2018, as extensively described elsewhere.[11] Participants were invited to the study centre in the early morning following overnight fasting. They underwent blood drawing, urine collection, anthropometric analysis, blood pressure measurements, clinical examinations, and standardized self- and interviewer-administered questionnaires about medical history and lifestyle. The validated Global Allergy and Asthma Network of Excellence (GA<sup>2</sup>LEN) food frequency questionnaire (FFQ),[12] was introduced in 2014 and filled out by 8,842 participants.

We excluded participants reporting a diagnosis of any kidney disease,[13] hypertension, or diabetes, according to the questionnaire interview or the provision of corresponding medications (**Supplementary Table S1**). We further excluded 5 participants with >80% missing laboratory biomarker data, 34 participants with >20% missing FFQ items, and 86 out of the 0.5<sup>th</sup>-99.5<sup>th</sup> percentile range of the total energy intake (TEI)/basal metabolic rate ratio (see flowchart in **Supplementary Figure S1**). Residual missing values in the FFQ were assumed to indicate non-consumption and imputed as 'rarely or never'. [14] Missingness in all other variables was dealt with Multiple Imputations by Chained Equations (MICE) using the 'mice' R package v3.14.0.[15] Sample characteristics remained stable between the imputed and unimputed datasets. Eventually, 6,133 individuals were available for analysis.

### *Outcome*

The outcome of our analyses was eGFR, estimated from serum creatinine using the 2021 CKD-EPI equation, using the R package 'nephro' v1.3.[16]

### *Assessment of Dietary Intake*

Participants were asked to report in the GA<sup>2</sup>LEN FFQ how often they typically consumed one portion of each of 229 foods and beverages over the last year, selecting one among various options: rarely or never; once per month; once per week; 2-4 times per week; 5-6 times per week; once per day; and 2+ times per day. The consumption of each item was converted to grams per day, using the most recent edition of the Composition of Foods Table[17] to further determine macro- and micro-nutrients and total energy intake (TEI; kcal/day).

### *Definition of the DASH-score*

Adherence to a DASH-style diet was assessed based on eight different food components known for their beneficial or detrimental effects on the risk of hypertension, according to Fung et al.[18] The DASH-diet relevant FFQ-derived food groups (**Supplementary Table S2**), expressed in servings per week, were classified as 'healthy' (fruits, vegetables, whole grains, low-fat dairy products, and nuts and legumes) and 'unhealthy' (red and processed meats, sodium, and sugar-sweetened beverages (SSB)). The nutrient residual method was used to adjust the DASH components for sex-specific energy intake.[19] The components were then categorised into sex-specific quintiles and ranked from 1 to 5 if belonging to the 'healthy group' and from 5 to 1 otherwise. Since the intake of SSB was generally low (interquartile range, IQR: 1-to-7 servings/week) compared to the US population, where the score was developed, we used sex-specific tertiles of the distribution to rank this specific component from 3 to 1. Finally, the total DASH-score was calculated as the sum of all ranks, with the total score ranging from 8 to 36.

### *Deriving RRR-scores*

Prior to using the RRR method to derive DPs,[8] the 229 FFQ items were categorized into 32 groups based on between-food similarity (**Supplementary Table S2**) and adjusted for sex-specific TEI using the nutrient residual method.[19] We then derived RRR-DPs separately for males and females to capture sex-specific dietary profiles associated with clinical and biochemical markers with known risk for CKD. Selected mediators, chosen for their known association with kidney health were: glycated haemoglobin (HbA1c), mean arterial pressure (MAP),[20] C-reactive protein (CRP), uric acid, total cholesterol (TC), ferritin, fibrinogen, serum potassium, and haemoglobin (HGB). Quantile normalization to the last assay was used to account for changes in measurement methods.[21, 22] To prevent confounding, all mediators were age-adjusted and, by means of multilevel models with random intercept for household, we controlled for family-related lifestyle or related environmental effects. The optimal number of DPs was

identified via screeplot inspection, resulting in 2 DPs. Each DP represented a linear combination of the effects of the food groups on the mediators, summarized through a set of factor loadings. A dietary score (RRR-score) was calculated using the estimated factor loadings as weights for the standardized intake of each food item.[23] RRR modelling and optimal rank estimation were performed using the R package 'rrpack' v0.1-12.[24]

### *Assessment of covariates*

Potential confounders were identified via Directed Acyclic Graph (DAG) analysis (**Supplementary Figure S1**) using the online tool DAGitty (<https://www.dagitty.net/dags>).[25] We considered: age; sex; BMI (derived from weight and height measured at the study centre); physical activity (continuous Metabolic Equivalent of Task; MET);[26, 27] smoking habit (Current, Former, Never smoker);[28] education level (Primary school or no title; Lower secondary school; Vocational school; Upper secondary school; and University or higher); and special diet (Yes, No; indicating whether participants reported following a special diet for medical reasons). To account for non-independency of observations due to relatedness, models were adjusted for the first 10 principal components of the genotyped data with minor allele frequency >5%. [29] Since menstruation cessation was targeted as a potential effect modifier in the diet-eGFR association, females were classified in two groups based on their menstrual status: Menstruation<sub>Yes</sub> and Menstruation<sub>No</sub> according to their response to the question “Do you still have regular menstrual bleedings?”. Individuals with missing information on menstrual status (N=32) were assigned Menstruation<sub>No</sub> if >50 years old and Menstruation<sub>Yes</sub> otherwise.

### *Statistical analyses*

To describe and compare the DPs, we estimated the Pearson correlation coefficients between all the DP-scores, including the DASH-score, and between each age-adjusted RRR food group and the scores.

The relationship between the DASH-score, RRR-scores, and eGFR was analysed through linear regression models. To allow direct comparison of the estimates given the different scales of the scores, all dietary scores were z-standardized (mean=0, variance=1), allowing associations to be interpreted as per 1 standard deviation (1-SD) change. To reflect differences both in the DPs and disease propensity



between males and females, only sex-specific analyses were performed. As informed by the DAG (**supplementary Figure S2**), all models were adjusted for age, TEI, physical activity, smoking habits, education, BMI and special diet. To allow for potential non-linear effects, we additionally fitted generalized additive models (GAMs) with penalized regression splines for age and DP-scores, with smoothing parameter  $\lambda$  derived via restricted maximum likelihood, using the R package 'mgcv' v1.8-40.[30]

To investigate the potential influence of menstruation cessation on the relationship between diet and eGFR in females, we performed a preliminary analysis including an interaction term between DASH diet, DP-scores and menstrual status ( $\text{Menstruation}_{\text{Yes}}$ ;  $\text{Menstruation}_{\text{No}}$ ). To exclude the possibility of a modification effect of age, an interaction between DP-scores and age was also included in the models. Following the observed evidence that menstrual status was an effect modifier for one of the DP-scores (see **Supplementary Table S3** with dedicated information on the interaction analysis, and Results section), all analyses in females were additionally stratified accordingly.

To control for potential residual confounding driven by dietary changes due to any sub-clinical health conditions, we conducted a sensitivity analysis excluding participants with sub-clinical diabetes mellitus, reduced kidney function or microalbuminuria ( $\text{HbA1c} > 6.5$  mmol/mol or  $\text{eGFR} < 60$  mL/min/1.73m<sup>2</sup> or urinary albumin-to-creatinine ratio (UACR)  $> 30$  mg/g), which we refer to as the Healthy+ sample.

All analyses were performed using the R software v4.1.1.[31]

## Results

### *Participant characteristics*

Our sample included 3278 females and 2855 males of similar age around 40 years old (**Table 1**). Females had lower median eGFR than males (99.8 versus 104.5 ml/min/1.73m<sup>2</sup>). Levels of selected mediator biomarkers were generally higher in males, except for CRP and fibrinogen, which were higher in females, and HbA1c and TC, which were equally distributed between sexes. When stratifying females by menstrual status, we observed higher levels of all biomarkers in females with ceased menstruation ( $\text{Menstruation}_{\text{No}}$ ) except for CRP. As expected, due to higher age (57.2 versus 32.8 years), this group had lower median eGFR (88.4 versus 104.1 ml/min/1.73m<sup>2</sup>; **Table 1**).

### *Description of the DASH score, RRR-scores and their correlations*

The overall DASH-score was equally distributed among sexes by design, as it was derived from sex-specific food intake quintiles. With respect to the DASH-score relevant dietary components, we observed a higher intake of ‘healthy’ food items (nuts and legumes, vegetables, fruit and fruit juices) in females, while males reported a higher intake of ‘unhealthy’ items, especially sodium, and red and processed meat (**Table 1**). Stratification of females by menstrual status revealed relevant differences in dietary habits, with lower intake of sodium, red and processed meat, and SSB after menstruation cessation, combined with higher intake of refined grains, vegetables, and fruits and fruit juices.

A general description of all dietary components used to derive RRR-scores is provided in **Supplementary Table S4**. We identified two RRR-scores for males and two different ones for females, which we labeled as  $MDP_1$  and  $MDP_2$  and  $FDP_1$  and  $FDP_2$ , respectively (**Figure 1**). A high  $MDP_1$  reflected lower levels of all biomarkers. It was driven by higher intake of whole grains and cereals, sugar, fruits, and legumes, and lower intake of beer, and red and processed meat. High  $MDP_2$ , which was associated with higher levels of HGB and HbA1c, and lower levels of TC, serum potassium, and ferritin, was mainly driven by low intake of coffee, alcohol (wine and beer), fish, fat, vegetable-based oils, and vegetables. In females, high  $FDP_1$  was associated with lower levels of uric acid, MAP, fibrinogen, ferritin, and CRP.  $FDP_1$  was driven by higher intake of whole grains, and dairy products, and by low intake of red and processed meat, refined grains, fish, poultry and alcohol (beer and spirits). High  $FDP_2$ , which corresponded to higher levels of uric acid, HGB, and ferritin levels, and low levels of TC, MAP, HbA1c, fibrinogen and CRP, was driven by higher intake of beef, nuts, beer, legumes, fish, and coffee, and lower intake of refined grain.

While the correlations between RRR-scores were null by design, in males, we observed moderate positive correlations of the DASH-score with  $MDP_1$  ( $r_{DASH-MDP1}=0.52$ ) and a weak negative correlation with  $MDP_2$  ( $r_{DASH-MDP2}=-0.27$ ). In females, we observed a moderate positive correlation of the DASH-score with  $FDP_1$  ( $r_{DASH-FDP1}=0.34$ ) and a weak positive correlation with  $FDP_2$  ( $r_{DASH-FDP2}=0.18$ ).

#### *Associations between DASH-score, RRR-scores and eGFR*

The preliminary analysis in females (**Supplementary Table S3**) investigating the potential modification effects of age and menstrual status, showed a significant interaction between menstrual status and  $FDP_1$  ( $\hat{\beta}$ : 2.12 ml/min/1.73 m<sup>2</sup>; 95%CI: 0.85, 3.40).

Final associations between DPs and eGFR are summarized in **Table 2**. In males, each 1-SD increase in the DASH-score was associated with 0.64 ml/min/1.73 m<sup>2</sup> (estimated association coefficient,  $\hat{\beta}$ ) higher eGFR

(95%CI: 0.22, 1.06). The GAM's estimated degrees of freedom (edf) were 1.8, suggesting a slightly quadratic association (**Figure 2**). In females, no association was found between the DASH-score and eGFR, independent of menstrual status.

Regarding the RRR-scores in males,  $MDP_1$  was positively associated with eGFR ( $\hat{\beta}$ =0.75 ml/min/1.73 m<sup>2</sup>; 95%CI: 0.38, 1.13); no association was observed between  $MDP_2$  and eGFR. In females, we observed negative associations between  $FDP_2$  and eGFR, both overall ( $\hat{\beta}$ : -0.36 ml/min/1.73 m<sup>2</sup>; 95%CI: -0.70, -0.02), and in the Menstruation<sub>Yes</sub> group ( $\hat{\beta}$ : -0.43 ml/min/1.73 m<sup>2</sup>; 95%CI: -0.83, -0.04). In the Menstruation<sub>No</sub> group, results showed a positive association between  $FDP_1$  and eGFR ( $\hat{\beta}$ : 1.11 ml/min/1.73 m<sup>2</sup>; 95%CI: 0.34, 1.88). The GAMs confirmed both significance and linearity of the results, with 1 edf for all significant associations (**Figure 2**).

### *Sensitivity analyses*

The Healthy+ subgroup did not differ substantially from the overall sample (**Supplementary Table S5**). Results between the DPs and eGFR remained stable in the Healthy+ subgroups (**Supplementary Table S6**). In males, we confirmed the positive association with eGFR for the DASH-score ( $\hat{\beta}$ : 0.67 ml/min/1.73 m<sup>2</sup>; 95%CI: 0.24, 1.09) and  $MDP_1$  ( $\hat{\beta}$ : 0.83 ml/min/1.73 m<sup>2</sup>; 95%CI: 0.44, 1.21), whereas again no association was seen between  $MDP_2$  and eGFR. In females,  $FDP_2$  was negatively associated with eGFR both overall ( $\hat{\beta}$ : -0.39 ml/min/1.73 m<sup>2</sup>; 95%CI: -0.73, -0.04), and in the Menstruation<sub>Yes</sub> group ( $\hat{\beta}$ : -0.46 ml/min/1.73 m<sup>2</sup>; 95%CI: -0.87, -0.05). In the Menstruation<sub>No</sub> group,  $FDP_1$  appeared to be linearly associated with eGFR in the GAM, however this association was not confirmed by the linear model. In all models we observed a slight increase in the magnitude of the significant associations. GAMs confirmed both linearity and significance of those associations.

### **Discussion**

In this investigation, we applied two different methodological approaches to estimate DPs, providing novel insights into the relationship between diet and kidney function in the general population. Our main findings suggest a role of sex and menstrual status in CKD prevention through diet. In males, a diet with higher intake of cereals, whole grains, sugar, fruits, and legumes, and low intake of beer, red and processed meat, was associated with higher eGFR, reflecting better kidney function. A similar associa-

tion was observed for high adherence to a DASH-style diet. In females, the associations between diet and eGFR varied by menstrual status. After menstruation cessation (Menstruation<sub>No</sub>) a DP characterized by low intake of any kind of meat, alcohol (beer and spirits) and fish, and high intake of whole grains and dairy products was associated with a higher eGFR. Before menstruation cessation (Menstruation<sub>Yes</sub>) higher intake of beef, nuts, beer, legumes, fish, and coffee, and a low intake of refined grains was found to be associated with lower eGFR. This latter result was consistent with the observations in the overall group of women.

The DASH diet has been favourably linked to relevant risk factors associated with CKD onset, such as insulin resistance, hypertension, and dyslipidemia, and might therefore also be protective against kidney dysfunction.[4, 18] A recent meta-analysis of six observational studies estimated that higher adherence to the DASH-score was associated with a 23% lower risk of developing CKD.[5] However, a negative association between DASH-style diet and CKD risk was observed only in studies where the index was extracted from nutrients, but not food groups. In contrast to these, we found that higher adherence to the food group-based DASH-score was associated with higher eGFR in males only, reflecting better kidney function. Although the DASH-score was derived from sex-specific quintiles, hence similarly distributed in males and females, we observed large differences in the actual consumption of the specific DASH dietary components. Specifically, higher consumption of 'healthy' food items (nuts and legumes, vegetables, fruit and fruit juices) was observed in females, and higher consumption of 'unhealthy' items, especially sodium, and red and processed meat in males. This could to some extent explain the sex-related discrepancies in our findings.

To the best of our knowledge, this is the first investigation using CVD and CKD risk biomarkers to identify disease-oriented DPs using RRR in a generally healthy population. Other studies applying RRR have selected different sets of biomarkers, as well as different kidney outcomes. In a population-based cohort in the north of the Netherlands, Cai and colleagues[32] derived RRR-based DPs directly related to eGFR at baseline and evaluated its association with eGFR decline and CKD incidence at five-year follow-up. Among females, they observed a DP characterized by high consumption of eggs, cheese, and legumes, and low consumption of sweets, white meat, and commercially prepared dishes. In males, the DP was characterized by high consumption of cheese, bread, milk, fruits, vegetables, and beer and low consumption of white and red meat. Higher adherence to the scores was associated with lower risk of eGFR decline in both sexes, which aligns with our results. Using health screening data from a health institute in Taiwan, Kurniawan et al.[10] estimated kidney function-oriented DPs including waist-to-hip ratio, triglycerides, LDL-C, TC/HDL-C, calcium, phosphorus, creatinine, and blood urea nitrogen as mediators,

and identified a corresponding DP associated with increased risk of impaired kidney function among older individuals with CKD. High adherence to this DP was characterized by higher intake of preserved vegetables, processed meat or fish, rice or flour products, meat, soy sauce, organ meats, fried rice or flour products, and instant noodles, along with lower intakes of fruits, dark-coloured vegetables, bread, and beans or bean products. Although we used a different set of biomarkers and conducted the analyses among a population free of CKD and related comorbidities, our results are at least partially concordant with their findings regarding the obtained DPs and the association with kidney function, specifically in males.

Overall, in both sexes any kind of meat and fish, as well as whole grains, fruits, vegetables, legumes, and nuts, played a strong role in the RRR-based DP composition. Animal-sourced proteins, processed foods, and refined grains are known to result in high acidic loads when metabolized,[10] in contrast with vegetable-sourced proteins, which lead lower acidic loads.[33] High dietary acidic load may consequently induce kidney adaptive mechanisms to increase acid excretion, thereby promoting renal injury.[34] Moreover, a higher plant-to-animal protein ratio in the diet may protect against kidney dysfunction by increasing serum bicarbonate levels and reducing fibroblast growth factor 23 levels.[5, 35] We have observed a similar impact of poultry and fish consumption in two of our previous analyses investigating associations between nutrient-related DPs and kidney function and damage[36] as well as the impact of different protein sources on eGFR.[37] Although regular fish intake is suggested to promote general and specifically cardiovascular health, some uncertainties remain regarding its health benefits, which could be related to the type and preparation of the fish and whether it is processed.[38] Moreover, fruit and vegetable consumption may exert beneficial effects on kidney function through higher intake of fiber, magnesium and potassium. Low fiber consumption has been associated with increased inflammatory cytokines which may contribute to impaired kidney function.[5] Nuts and legumes are rich in magnesium and potassium. Higher magnesium intake might preserve kidney function through reduction of endothelial dysfunction ,[39] while higher potassium intake could contribute through the mitigation of blood pressure levels.[40]

In females, we found potential evidence of the diet-eGFR association to be modified by menstrual status. Specifically, we observed a negative association between FDP<sub>2</sub> and eGFR in females who reported still having regular menstrual bleedings. In females with ceased menstruation, we observed a positive association between FDP<sub>1</sub> and eGFR. These differences might suggest a role of iron metabolism and ferritin levels that could modify the relationship between diet and kidney function in females. A recent Jap-

anese study revealed that both low and high serum ferritin levels are linked to increased risk of adverse kidney outcomes compared to intermediate levels.[41] Elevated serum ferritin levels, in particular, may pose a risk of iron overload.[42, 43] Moreover, ferritin is closely related to other inflammation markers.[44] Together with ferritin, in fact, CRP and fibrinogen were also relevant for FDP<sub>1</sub> profile, supporting evidence from previous studies suggesting a potential role of inflammation on kidney function levels.[45] In addition, the concurrent presence of high serum uric acid and CRP levels could be associated with an increased risk of type II diabetes.[46] Therefore it seems reasonable to observe higher eGFR levels in individuals with a dietary profile (FDP<sub>1</sub>) associated with lower levels of these markers. Nevertheless, when interpreting these results, it is important to remember that baseline levels of biomarkers differed by menstrual status, with higher levels of all biomarkers observed in females with ceased menstruation, except for CRP.

The comparison of the two approaches to define the DPs revealed a positive correlation between the RRR-based MDP<sub>1</sub> and the DASH score. This suggests that our population-specific, disease-oriented DPs, based on several markers related to CVD, do reflect, to some extent, the dietary guidelines defined to contrast hypertension (DASH) in males. Overall, the RRR-scores were more strongly associated with eGFR than the DASH-score. This might be due to the flexibility of the approach, allowing to shape DPs in a disease-related manner, potentially leading to the detection of unknown associations and complex mechanisms. For example, FDP<sub>2</sub> was weakly correlated with the DASH-score, but it highlighted a relevant pattern related to lower eGFR in the Menstruation<sub>Yes</sub> group. Despite being beyond the scope of our investigation, it is worth considering the appropriateness of selecting common biomarkers for males and females, particularly given recent studies highlighting sex differences in disease biomarkers, as observed in CVDs.[47] This further emphasizes the recent recognition of sex differences in the aetiology, mechanisms, epidemiology, and treatment of CKD.[48] Moreover, females are less likely to receive diagnoses, monitoring, and management compared to males.[49] While evidence suggests that sex influences various aspects of treatment and complications in later-stage kidney disease, research on its impact on earlier CKD stages is limited.[50, 51] While CKD is more prevalent in females,[13] kidney function declines more rapidly in males.[52] It has been hypothesized that these sex differences may be attributed to the protective effects of endogenous estrogens against the deleterious effects of testosterone on kidney function and structure, as well as the generally healthier lifestyles observed in females.[48] In addition, the role of menstrual status, probably mediated by ferritin and inflammation markers, underscores the need for further investigation concerning CKD in females.

The main strength of our investigation is the large sample size, which enabled us to conduct sex-stratified analyses without sacrificing statistical power. Next, diet was assessed through a validated FFQ. Third, we were able to include a wide set of parameters, including measured biochemical markers and information collected through self-reporting or by trained study-nurses. In particular, detailed information on medical history and lifestyle allowed us to control for an extensive range of relevant confounders. Finally, we included and compared two approaches to evaluate DPs in our sample. This enabled us to obtain a complementary and comprehensive overview of the role of diet in the association with eGFR. While using the DASH index simplified the interpretation and comparison of our findings with other studies, the complementary usage of a hybrid approach as RRR allowed us to derive our DPs in a more flexible and exploratory way. Specifically, it allowed us to consider the multifactorial and complex nature of CKD, often characterized by multiple comorbidities, which could share aspects of their pathophysiology and require the formulation of comprehensive dietary recommendations.

The main limitation of our investigation is the cross-sectional nature of the data. In fact, the simultaneous collection of health information and dietary intake could prevent causal interpretations of our findings. However, our choice of focusing on individuals who self-reported being free from CKD, hypertension, or diabetes, along with adjustments made for those following a special diet, may mitigate the risk of reverse causation. Moreover, the robustness of our results following the exclusion of individuals with subclinical diabetes mellitus (Healthy+), reduced kidney function, or microalbuminuria, confirms that, given the silent nature of CKD, especially in its early stages, it is unlikely to stimulate lifestyle changes prior to formal diagnosis. Another limitation is the absence of measured GFR and cystatin C in our study: GFR was estimated based on serum creatinine, which is also influenced by muscle mass and protein intake. This could have affected our results, especially those related to the consumption of animal-based foods, which are rich in protein. However, the use of 12-hour fasting plasma samples, as done by the CHRIS study, has been shown to mitigate the acute effect of meat consumption on serum creatinine levels.[53] Other limitations are related to the use of an FFQ to assess dietary intake. The first is represented by the common challenge of extrapolating sodium intakes.[54] This could have led to an underestimation of detrimental effects of lower adherence to the DASH diet, as well as other processed food items, rich in sodium and other additives.[55] Moreover, dietary intake was assessed only once, referring to the average intake of participants potentially leading to recall bias.

## **Conclusion**

A DASH-style diet and a disease-oriented dietary pattern characterized by higher intake of whole grains, cereals, fruits and legumes, and lower intake of beer, red and processed meat, SSBs and fruit juice, were associated with higher eGFR in males without CKD, diabetes and hypertension. In females, associations between RRR-based DPs and eGFR were modified by menstrual status. Overall, results highlight the need to consider sex-differences when studying the relationship between diet and kidney health.



## Tables and Figures Legend

**Table 1:** Sex-stratified characteristics of the study sample

|                                                       |                                      | Males,<br>N=2855 (46.6%)       | Females,<br>N=3278 (53.4%) | Menstruation <sub>Yes</sub> ,<br>N=2395 (73.1%) | Menstruation <sub>No</sub> ,<br>N=883 (26.9%) |                |
|-------------------------------------------------------|--------------------------------------|--------------------------------|----------------------------|-------------------------------------------------|-----------------------------------------------|----------------|
| Outcome                                               | eGFR ml/min/1.73 m <sup>2</sup>      | 104.5 (93.7, 115.1)            | 99.8 (89.9, 109.4)         | 104.1 (95.4, 112.7)                             | 88.4 (80.7, 95.8)                             |                |
| Dietary Pat-<br>terns: scores<br>and compo-<br>nents* | DASH score                           | 23 (19, 27)                    | 23 (19, 27)                | 22 (19, 26)                                     | 25 (21, 28)                                   |                |
|                                                       | Whole grains <sup>^</sup>            | 7.5 (4.4, 11.2)                | 7.5 (4.8, 10.7)            | 7.1 (4.5, 10.1)                                 | 8.7 (5.7, 12.4)                               |                |
|                                                       | Nuts and legumes <sup>^</sup>        | 1.8 (0.9, 3.2)                 | 1.8 (1, 3.3)               | 1.9 (1, 3.3)                                    | 1.8 (1.1, 3.3)                                |                |
|                                                       | Vegetables <sup>^</sup>              | 27.9 (19.6, 37.9)              | 34.9 (26, 45.8)            | 33.9 (25, 44.9)                                 | 38.4 (29.1, 47.9)                             |                |
|                                                       | Fruits and Fruit juices <sup>^</sup> | 13.7 (8.1, 22.3)               | 20.6 (12.4, 33.1)          | 19.4 (11.7, 30.7)                               | 24.6 (15.4, 39.1)                             |                |
|                                                       | Sweetened beverages <sup>^</sup>     | 3 (0.8, 7.8)                   | 1.3 (0, 4.8)               | 1.7 (0.4, 5.2)                                  | 0.4 (0, 2.9)                                  |                |
|                                                       | Red/processed meats <sup>^</sup>     | 10 (6.9, 13.7)                 | 6.3 (4.3, 9.1)             | 6.6 (4.5, 9.4)                                  | 5.7 (3.6, 8.5)                                |                |
|                                                       | Low-fat dairy <sup>^</sup>           | 0.6 (0, 2.8)                   | 0.6 (0, 3.9)               | 0.7 (0, 3.7)                                    | 0.5 (0, 4.2)                                  |                |
|                                                       | Sodium <sup>^</sup>                  | 1972.6 (1746.3, 2212.5)        | 1657.4 (1458.2, 1875)      | 1670.1 (1465, 1882.5)                           | 1637 (1442.3, 1850.6)                         |                |
|                                                       | FDP <sub>1</sub>                     | ---                            | 0.0 (-0.2, 0.2)            | 0.0 (-0.2, 0.2)                                 | 0.1 (-0.1, 0.3)                               |                |
|                                                       | FDP <sub>2</sub>                     | ---                            | 0.0 (-0.1, 0.1)            | 0.0 (-0.1, 0.1)                                 | 0.0 (-0.1, 0.1)                               |                |
|                                                       | MDP <sub>1</sub>                     | 0 (-0.2, 0.2)                  | ---                        | ---                                             | ---                                           |                |
|                                                       | MDP <sub>2</sub>                     | 0 (-0.1, 0.1)                  | ---                        | ---                                             | ---                                           |                |
|                                                       |                                      | Hba1c, %                       | 5.3 (5.1, 5.5)             | 5.3 (5.1, 5.5)                                  | 5.2 (5.0, 5.4)                                | 5.5 (5.3, 5.6) |
|                                                       | MAP, mmHg                            | 91.0 (85.0, 97.3)              | 85.3 (79.3, 92.0)          | 83.7 (78.3, 89.3)                               | 91.3 (83.7, 97.7)                             |                |
|                                                       | CRP, mg/dL                           | 0.1 (0.1, 0.2)                 | 0.2 (0.1, 0.3)             | 0.2 (0.1, 0.3)                                  | 0.2 (0.1, 0.3)                                |                |
|                                                       | Uric acid, mg/dL                     | 6.0 (5.3, 6.7)                 | 4.4 (3.8, 5.0)             | 4.3 (3.8, 4.9)                                  | 4.7 (4, 5.3)                                  |                |
|                                                       | TC, mg/dL                            | 203.0 (174.0, 231.0)           | 203.0 (178.0, 231.0)       | 194.0 (172.0, 219.0)                            | 231.0 (205.0, 261.0)                          |                |
|                                                       | Ferritin, ng/mL                      | 135.7 (84.9, 211.2)            | 36.1 (18.9, 63.8)          | 28.8 (15.5, 49.3)                               | 66.8 (42.2, 105.2)                            |                |
|                                                       | Fibrinogen, mg/dL                    | 272.0 (240.0, 307.0)           | 294.0 (262.0, 332.0)       | 286.0 (255.0, 322.0)                            | 318.0 (288.0, 355.0)                          |                |
|                                                       | Potassium, mmol/L                    | 3121.3 (2485.9, 3891.6)        | 3203.5 (2562.8, 3995.1)    | 3149.3 (2534.4, 3924.1)                         | 3358.6 (2692.2, 4141.1)                       |                |
|                                                       | HGB, g/dL                            | 15.8 (15.2, 16.5)              | 13.9 (13.3, 14.5)          | 13.8 (13.2, 14.4)                               | 14.2 (13.5, 14.8)                             |                |
| Quantitative<br>covariates*                           | Age, years                           | 40.0 (27.5, 51.6)              | 39.3 (26.4, 51.5)          | 32.8 (23.2, 42.4)                               | 57.2 (52.9, 63.5)                             |                |
|                                                       | Physical activity, MET-min/week      | 4056.0 (1950.0, 7146.0)        | 3006.0 (1386.0, 5674.1)    | 2826.0 (1314.0, 5269.5)                         | 3756.0 (1522.5, 6075.8)                       |                |
|                                                       | Total Energy Intake, kcal            | 1972.2 (1617.9, 2403.1)        | 1829.8 (1492.0, 2223.9)    | 1822.7(1480.8, 2215.7)                          | 1855.3(1536.9, 2249.7)                        |                |
|                                                       | BMI, kg/m <sup>2</sup>               | 25.1 (23.1, 27.7)              | 23.5 (21.3, 26.7)          | 23.1 (20.9, 26.0)                               | 24.8 (22.3, 28.2)                             |                |
| Categorical<br>covariates**                           | Smoking<br>habit                     | <i>Never smoker</i>            | 1512 (53.0)                | 1897 (57.9)                                     | 1400 (58.5)                                   | 497 (56.3)     |
|                                                       |                                      | <i>Current smoker</i>          | 613 (21.5)                 | 626 (19.1)                                      | 494 (20.6)                                    | 132 (14.9)     |
|                                                       |                                      | <i>Past smoker</i>             | 730 (25.6)                 | 755 (23.0)                                      | 501 (20.9)                                    | 254 (28.8)     |
|                                                       | Education                            | <i>Primary school/no title</i> | 123 (4.3)                  | 184 (5.6)                                       | 22 (0.9)                                      | 162 (18.3)     |

|              |                               |             |             |             |            |
|--------------|-------------------------------|-------------|-------------|-------------|------------|
|              | <i>Lower secondary school</i> | 361 (12.6)  | 566 (17.3)  | 341 (14.2)  | 225 (25.5) |
|              | <i>Upper secondary school</i> | 626 (21.9)  | 1042 (31.8) | 922 (38.5)  | 120 (13.6) |
|              | <i>Vocational school</i>      | 1515 (53.1) | 1035 (31.6) | 696 (29.1)  | 339 (38.4) |
|              | <i>University or higher</i>   | 230 (8.1)   | 451 (13.8)  | 414 (17.3)  | 37 (4.2)   |
| Special diet | Yes                           | 79 (2.8)    | 153 (4.7)   | 113 (4.7)   | 40 (4.5)   |
|              | No                            | 2776 (97.2) | 3125 (95.3) | 2282 (95.3) | 843 (95.5) |

\* median and interquartile range (IQR); \*\* N (%);

^ portions per week.

**Table 2:** Results of the linear (LM) and generalized additive models (GAM). LM: Effects of DPs on eGFR in ml/min/1.73 m<sup>2</sup> with 95% confidence intervals (CI) and p-values; GAM: estimated degrees of freedom (edf) and p-values.

|                  |                             | LM                  |                      | GAM    |         |        |
|------------------|-----------------------------|---------------------|----------------------|--------|---------|--------|
|                  |                             | Effect (95% CI)     | p-value              | edf*   | p-value |        |
| Males            | DASH                        | 0.64 (0.22, 1.06)   | 0.0029               | 1.8    | 0.0082  |        |
|                  | MDP <sub>1</sub>            | 0.75 (0.38, 1.13)   | 0.0001               | 1.0    | 0.0001  |        |
|                  | MDP <sub>2</sub>            | 0.04 (-0.42, 0.50)  | 0.8676               | 2.4    | 0.1149  |        |
| Females          | DASH                        | -0.18 (-0.54, 0.19) | 0.3448               | 2.01   | 0.2450  |        |
|                  | FDP <sub>1</sub>            | 0.24 (-0.16, 0.64)  | 0.2345               | 2.46   | 0.2319  |        |
|                  | FDP <sub>2</sub>            | -0.36 (-0.7, -0.02) | 0.0392               | 1.00   | 0.0386  |        |
| Menstrual status | Menstruation <sub>Yes</sub> | DASH                | -0.26 (-0.69, 0.17)  | 0.2389 | 1.9     | 0.2366 |
|                  |                             | FDP <sub>1</sub>    | -0.01 (-0.48, 0.46)  | 0.9593 | 1.3     | 0.9151 |
|                  |                             | FDP <sub>2</sub>    | -0.43 (-0.83, -0.04) | 0.0326 | 1.0     | 0.0327 |
|                  | Menstruation <sub>No</sub>  | DASH                | 0.06 (-0.63, 0.76)   | 0.8610 | 1.0     | 0.8358 |
|                  |                             | FDP <sub>1</sub>    | 1.11 (0.34, 1.88)    | 0.0049 | 1.0     | 0.0035 |
|                  |                             | FDP <sub>2</sub>    | 0.00 (-0.65, 0.65)   | 0.9969 | 1.0     | 0.9801 |

Symbols and abbreviations: CI, confidence interval of the effect; edf, estimated degrees of freedom.

**Figure 1:** Representation of the Dietary Patterns (DPs). a) RRR-based eigenvectors summarizing the influence of the biomarkers in defining the respective DP-scores in males and females. b) Heatmaps of the Pearson's correlation coefficients between RRR food groups and DP scores.

**Figure 2:** Plots of predicted eGFR levels by the different scores, as obtained from the fitted GAMs.

## References

1. Francis A, Harhay MN, Ong ACM, et al (2024) Chronic kidney disease and the global public health agenda: an international consensus. *Nat Rev Nephrol* 20:473–485. <https://doi.org/10.1038/s41581-024-00820-6>
2. Ortiz A, Mattace-Raso F, Soler MJ, Fouque D (2022) Ageing meets kidney disease. *Clinical Kidney Journal* 15:1793–1796. <https://doi.org/10.1093/ckj/sfac151>
3. Kelly J, Su G, Zhang L, et al (2021) Modifiable Lifestyle Factors for Primary Prevention of CKD: A Systematic Review and Meta-Analysis. *Journal of the American Society of Nephrology*: JASN 32:. <https://doi.org/10.1681/ASN.2020030384>
4. Rebholz C, Crews D, Grams M, et al (2016) DASH (Dietary Approaches to Stop Hypertension) Diet and Risk of Subsequent Kidney Disease. *American journal of kidney diseases*: the official journal of the National Kidney Foundation 68:. <https://doi.org/10.1053/j.ajkd.2016.05.019>
5. Mozaffari H, Ajabshir S, Alizadeh S (2020) Dietary Approaches to Stop Hypertension and risk of chronic kidney disease: A systematic review and meta-analysis of observational studies. *Clinical Nutrition* 39:2035–2044. <https://doi.org/10.1016/j.clnu.2019.10.004>
6. Heindel J, Baid-Agrawal S, Rebholz CM, et al (2020) Association Between Dietary Patterns and Kidney Function in Patients With Chronic Kidney Disease: A Cross-Sectional Analysis of the German Chronic Kidney Disease Study. *Journal of Renal Nutrition* 30:296–304. <https://doi.org/10.1053/j.jrn.2019.09.008>
7. Zhao J, Li Z, Gao Q, et al (2021) A review of statistical methods for dietary pattern analysis. *Nutr J* 20:37. <https://doi.org/10.1186/s12937-021-00692-7>
8. Hoffmann K, Schulze MB, Schienkiewitz A, et al (2004) Application of a New Statistical Method to Derive Dietary Patterns in Nutritional Epidemiology. *American Journal of Epidemiology* 159:935–944. <https://doi.org/10.1093/aje/kwh134>
9. Schulz C-A, Oluwagbemigun K, Nöthlings U (2021) Advances in dietary pattern analysis in nutritional epidemiology. *Eur J Nutr* 60:4115–4130. <https://doi.org/10.1007/s00394-021-02545-9>
10. Cai Q, Dekker LH, Bakker SJL, et al (2020) Dietary Patterns Based on Estimated Glomerular Filtration Rate and Kidney Function Decline in the General Population: The Lifelines Cohort Study. *Nutrients* 12:1099. <https://doi.org/10.3390/nu12041099>
11. Kurniawan AL, Hsu C-Y, Rau H-H, et al (2019) Association of kidney function-related dietary pattern, weight status, and cardiovascular risk factors with severity of impaired kidney function in middle-aged and older adults with chronic kidney disease: a cross-sectional population study. *Nutrition Journal* 18:27. <https://doi.org/10.1186/s12937-019-0452-4>
12. Pattaro C, Gögele M, Mascalzoni D, et al (2015) The Cooperative Health Research in South Tyrol (CHRIS) study: rationale, objectives, and preliminary results. *J Transl Med* 13:348. <https://doi.org/10.1186/s12967-015-0704-9>

13. Garcia-Larsen V, Luczynska M, Kowalski ML, et al (2011) Use of a common food frequency questionnaire (FFQ) to assess dietary patterns and their relation to allergy and asthma in Europe: pilot study of the GA2LEN FFQ. *Eur J Clin Nutr* 65:750–756. <https://doi.org/10.1038/ejcn.2011.15>
14. Barbieri G, Roberto M, Hantikainen E, et al (2024) Development and evaluation of a kidney health questionnaire and estimates of chronic kidney disease prevalence in the Cooperative Health Research In South Tyrol (CHRIS) study. *medRxiv* 2024.03.24.24304607; doi: <https://doi.org/10.1101/2024.03.24.24304607>
15. Michels KB, Willett WC (2009) Self-administered semiquantitative food frequency questionnaires: patterns, predictors, and interpretation of omitted items. *Epidemiology* 20:295–301. <https://doi.org/10.1097/EDE.0b013e3181931515>
16. Buuren S van, Groothuis-Oudshoorn K (2011) mice: Multivariate Imputation by Chained Equations in R. *Journal of Statistical Software* 45:1–67. <https://doi.org/10.18637/jss.v045.i03>
17. Pattaro C, Riegler P, Stifter G, et al (2013) Estimating the Glomerular Filtration Rate in the General Population Using Different Equations: Effects on Classification and Association. *Nephron Clin Pract* 123:102–111. <https://doi.org/10.1159/000351043>
18. (2021) McCance and Widdowson's The Composition of Foods Integrated Dataset 2021
19. Fung TT, Chiuve SE, McCullough ML, et al (2008) Adherence to a DASH-Style Diet and Risk of Coronary Heart Disease and Stroke in Women. *Archives of Internal Medicine* 168:713–720. <https://doi.org/10.1001/archinte.168.7.713>
20. Willett WC, Howe GR, Kushi LH (1997) Adjustment for total energy intake in epidemiologic studies. *The American Journal of Clinical Nutrition* 65:1220S-1228S. <https://doi.org/10.1093/ajcn/65.4.1220S>
21. Dionne JM, Jiang S, Ng DK, et al (2021) Mean Arterial Pressure and Chronic Kidney Disease Progression in the CKiD Cohort. *Hypertension* 78:65–73. <https://doi.org/10.1161/HYPERTENSIONAHA.120.16692>
22. Noce D, Gögele M, Schwienbacher C, et al (2017) Sequential recruitment of study participants may inflate genetic heritability estimates. *Hum Genet* 136:743–757. <https://doi.org/10.1007/s00439-017-1785-8>
23. Bolstad BM, Irizarry RA, Åstrand M, Speed TP (2003) A comparison of normalization methods for high density oligonucleotide array data based on variance and bias. *Bioinformatics* 19:185–193. <https://doi.org/10.1093/bioinformatics/19.2.185>
24. Schulze MB, Hoffmann K, Kroke A, Boeing H (2003) An approach to construct simplified measures of dietary patterns from exploratory factor analysis. *Br J Nutr* 89:409–419. <https://doi.org/10.1079/BJN2002778>
25. Kun Chen (2022) rrpac: Reduced-Rank Regression

26. Textor J, van der Zander B, Gilthorpe MS, et al (2016) Robust causal inference using directed acyclic graphs: the R package “dagitty.” *Int J Epidemiol* 45:1887–1894. <https://doi.org/10.1093/ije/dyw341>
27. Craig CL, Marshall AL, Sjöström M, et al (2003) International physical activity questionnaire: 12-country reliability and validity. *Med Sci Sports Exerc* 35:1381–1395. <https://doi.org/10.1249/01.MSS.0000078924.61453.FB>
28. Ainsworth BE, Haskell WL, Leon AS, et al (1993) Compendium of physical activities: classification of energy costs of human physical activities. *Med Sci Sports Exerc* 25:71–80. <https://doi.org/10.1249/00005768-199301000-00011>
29. Murgia F, Melotti R, Foco L, et al (2019) Effects of smoking status, history and intensity on heart rate variability in the general population: The CHRIS study. *PLOS ONE* 14:e0215053. <https://doi.org/10.1371/journal.pone.0215053>
30. Jiang L, Zheng Z, Qi T, et al (2019) A resource-efficient tool for mixed model association analysis of large-scale data. *Nat Genet* 51:1749–1755. <https://doi.org/10.1038/s41588-019-0530-8>
31. Wood SN (2017) *Generalized additive models: an introduction with R*, Second edition. CRC Press/Taylor & Francis Group, Boca Raton
32. R Core Team (2021) *R: A language and environment for statistical computing*.
33. Remer T (2001) Influence of nutrition on acid-base balance--metabolic aspects. *Eur J Nutr* 40:214–220. <https://doi.org/10.1007/s394-001-8348-1>
34. Scialla JJ, Anderson CAM (2013) Dietary acid load: a novel nutritional target in chronic kidney disease? *Adv Chronic Kidney Dis* 20:141–149. <https://doi.org/10.1053/j.ackd.2012.11.001>
35. Di Iorio BR, Bellasi A, Raphael KL, et al (2019) Treatment of metabolic acidosis with sodium bicarbonate delays progression of chronic kidney disease: the UBI Study. *J Nephrol* 32:989–1001. <https://doi.org/10.1007/s40620-019-00656-5>
36. Barbieri G, Garcia-Larsen V, Lundin R, et al (2024) Associations Between Dietary Patterns and Kidney Health Assessed in the Population-Based CHRIS Study Using Reduced Rank Regression. *J Ren Nutr* S1051-2276(24)00051–7. <https://doi.org/10.1053/j.jrn.2024.03.003>
37. Vukovic V, Hantikainen E, Raftopoulou A, et al (2022) Association of dietary proteins with serum creatinine and estimated glomerular filtration rate in a general population sample: the CHRIS study. *J Nephrol* 36:103–114. <https://doi.org/10.1007/s40620-022-01409-7>
38. Mafra D, Kemp JA, Leal V de O, et al (2023) Consumption of Fish in Chronic Kidney Disease – A Matter of Depth. *Molecular Nutrition & Food Research* 67:2200859. <https://doi.org/10.1002/mnfr.202200859>
39. Rebholz CM, Tin A, Liu Y, et al (2016) Dietary Magnesium and Kidney Function Decline: The Healthy Aging in Neighborhoods of Diversity across the Life Span Study. *Am J Nephrol* 44:381–387. <https://doi.org/10.1159/000450861>

40. Nissaisorakarn V, Ormseth G, Earle W, et al (2023) Less sodium, more potassium, or both: population-wide strategies to prevent hypertension. *Am J Physiol Renal Physiol* 325:F99–F104. <https://doi.org/10.1152/ajprenal.00007.2023>
41. Fujisawa H, Nakayama M, Haruyama N, et al (2023) Association between iron status markers and kidney outcome in patients with chronic kidney disease. *Sci Rep* 13:18278. <https://doi.org/10.1038/s41598-023-45580-8>
42. WHO guideline on use of ferritin concentrations to assess iron status in individuals and populations. <https://www.who.int/publications/i/item/9789240000124>. Accessed 19 Jun 2024
43. Tsai Y-C, Hung C-C, Kuo M-C, et al (2012) Association of hsCRP, White Blood Cell Count and Ferritin with Renal Outcome in Chronic Kidney Disease Patients. *PLoS One* 7:e52775. <https://doi.org/10.1371/journal.pone.0052775>
44. Kell DB, Pretorius E (2014) Serum ferritin is an important inflammatory disease marker, as it is mainly a leakage product from damaged cells. *Metallomics* 6:748–773. <https://doi.org/10.1039/c3mt00347g>
45. Kalantar-Zadeh K, Rodriguez RA, Humphreys MH (2004) Association between serum ferritin and measures of inflammation, nutrition and iron in haemodialysis patients. *Nephrol Dial Transplant* 19:141–149. <https://doi.org/10.1093/ndt/gfg493>
46. Lee KW, Shin D (2022) Concurrent presence of high serum uric acid and inflammation is associated with increased incidence of type 2 diabetes mellitus in Korean adult population. *Sci Rep* 12:11000. <https://doi.org/10.1038/s41598-022-15176-9>
47. Lau ES, Paniagua SM, Guseh JS, et al (2019) Sex Differences in Circulating Biomarkers of Cardiovascular Disease. *Journal of the American College of Cardiology* 74:1543–1553. <https://doi.org/10.1016/j.jacc.2019.06.077>
48. Hara A, Tsujiguchi H, Suzuki K, et al (2021) Gender difference in the association of dietary intake of antioxidant vitamins with kidney function in middle-aged and elderly Japanese. *Journal of Nutritional Science* 10:e2. <https://doi.org/10.1017/jns.2020.54>
49. Swartling O, Yang Y, Clase CM, et al (2022) Sex Differences in the Recognition, Monitoring, and Management of CKD in Health Care: An Observational Cohort Study. *Journal of the American Society of Nephrology* 33:1903. <https://doi.org/10.1681/ASN.2022030373>
50. Wyld MLR, Mata NLDL, Viecelli A, et al (2022) Sex-Based Differences in Risk Factors and Complications of Chronic Kidney Disease. *Semin Nephrol* 42:153–169. <https://doi.org/10.1016/j.semnephrol.2022.04.006>
51. Lombardi G, Ferraro PM, De Tomi E, et al (2024) Sex differences in chronic kidney disease-related complications and mortality across levels of glomerular filtration rate. *Nephrol Dial Transplant* gfae087. <https://doi.org/10.1093/ndt/gfae087>



52. Xu S-S, Hua J, Huang Y-Q, Shu L (2020) Association between dietary patterns and chronic kidney disease in a middle-aged Chinese population. *Public Health Nutr* 23:1058–1066. <https://doi.org/10.1017/S1368980019002805>
53. Nair S, O'Brien SV, Hayden K, et al (2014) Effect of a Cooked Meat Meal on Serum Creatinine and Estimated Glomerular Filtration Rate in Diabetes-Related Kidney Disease. *Diabetes Care* 37:483–487. <https://doi.org/10.2337/dc13-1770>
54. McLean RM, Farmer VL, Nettleton A, et al (2017) Assessment of dietary sodium intake using a food frequency questionnaire and 24-hour urinary sodium excretion: a systematic literature review. *J Clin Hypertens (Greenwich)* 19:1214–1230. <https://doi.org/10.1111/jch.13148>
55. Parpia AS, L'Abbé M, Goldstein M, et al (2018) The Impact of Additives on the Phosphorus, Potassium, and Sodium Content of Commonly Consumed Meat, Poultry, and Fish Products Among Patients With Chronic Kidney Disease. *Journal of Renal Nutrition* 28:83–90. <https://doi.org/10.1053/j.jrn.2017.08.013>

# Males

# Females

a)

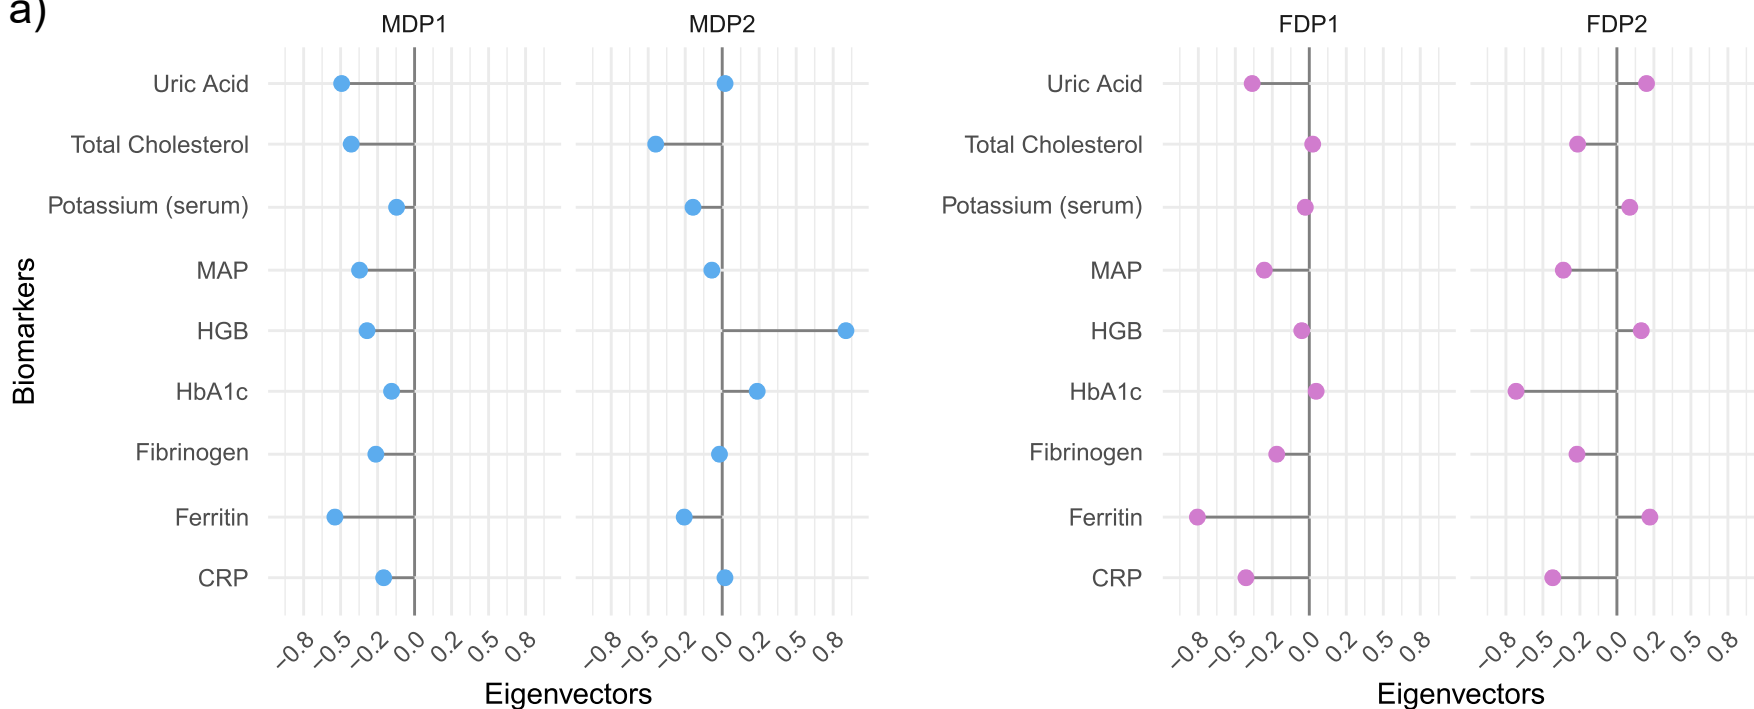

b)

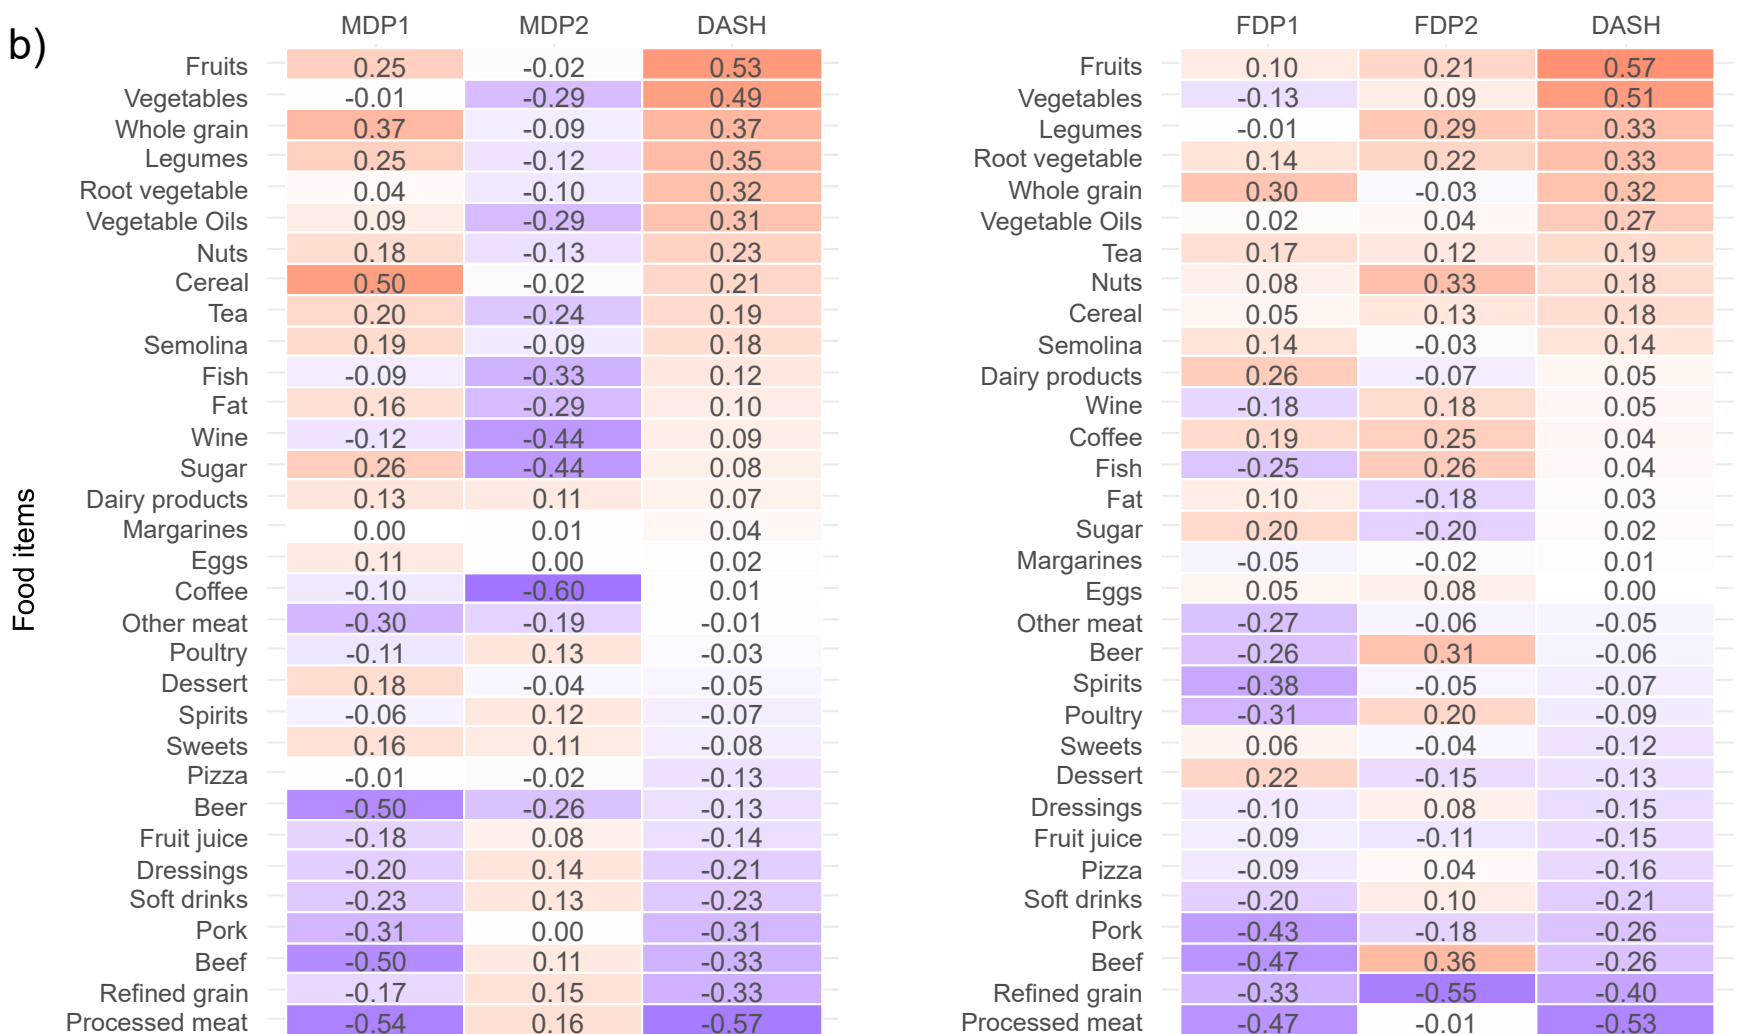

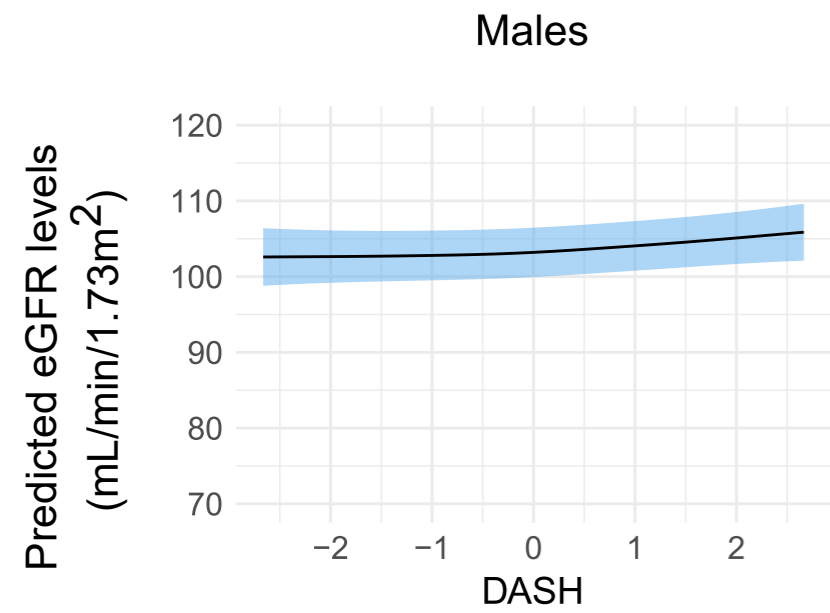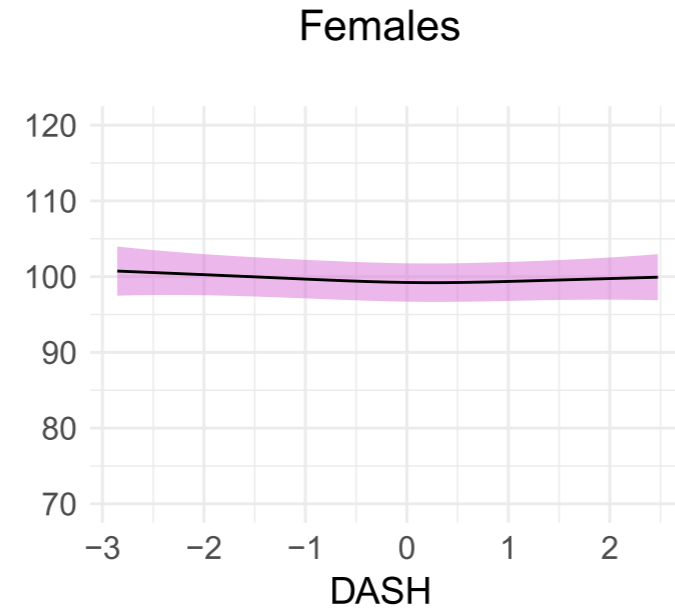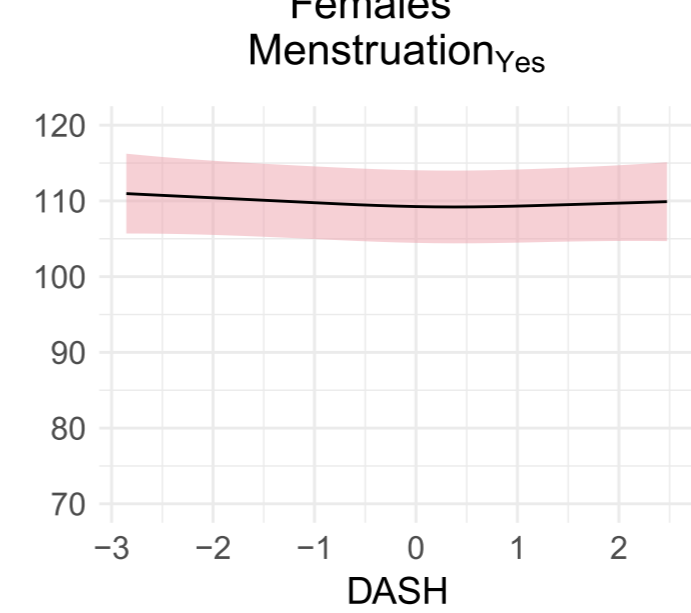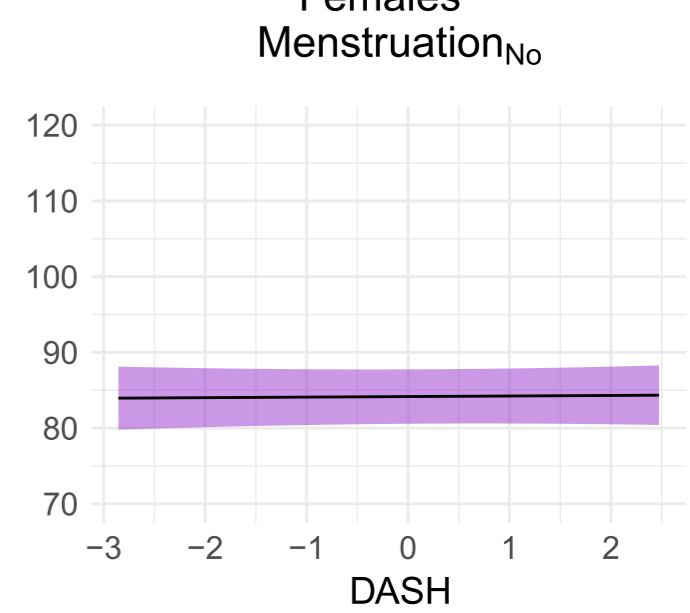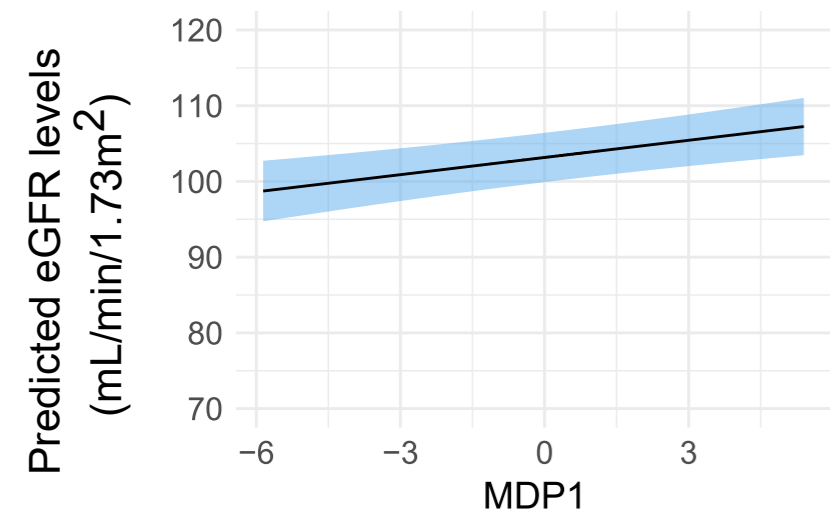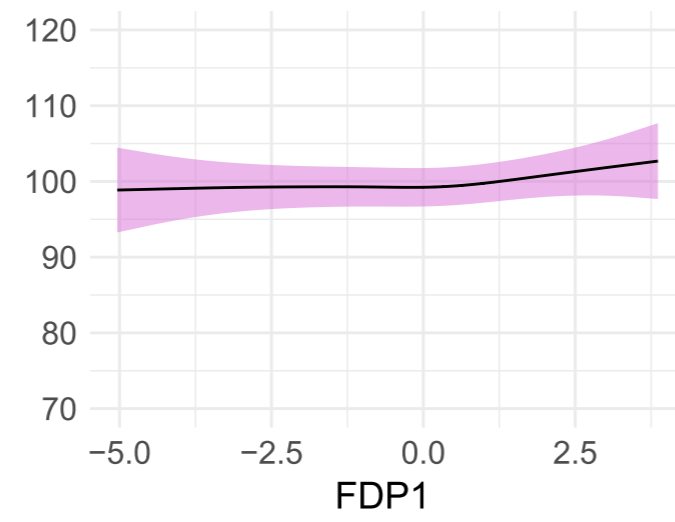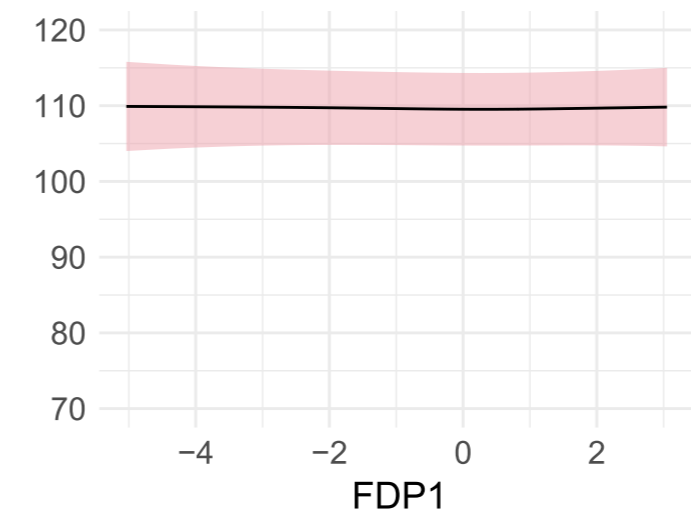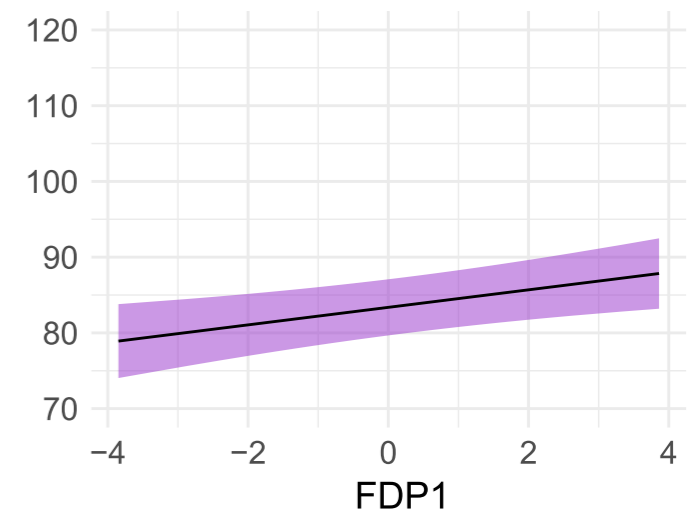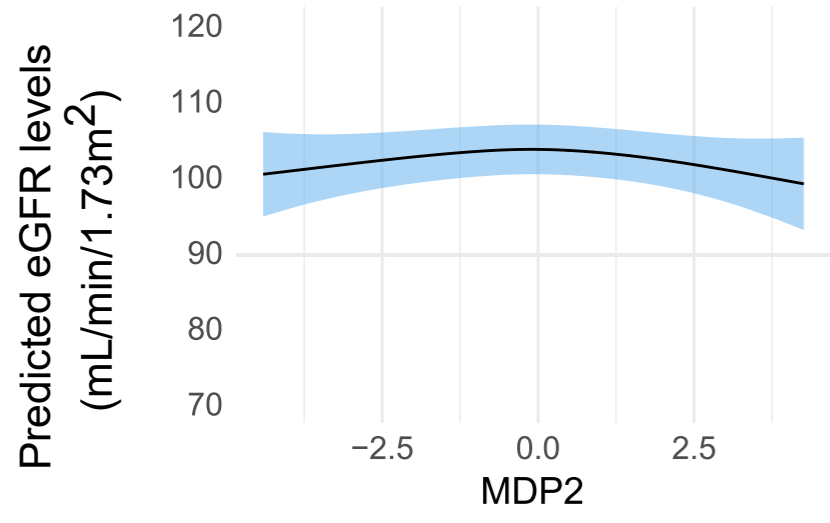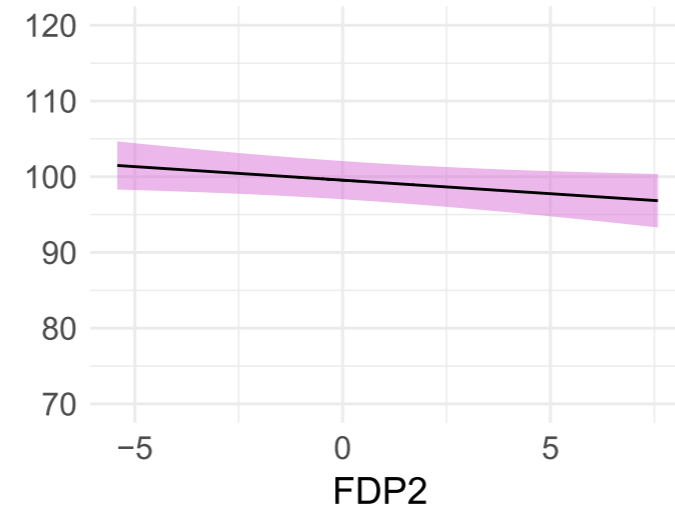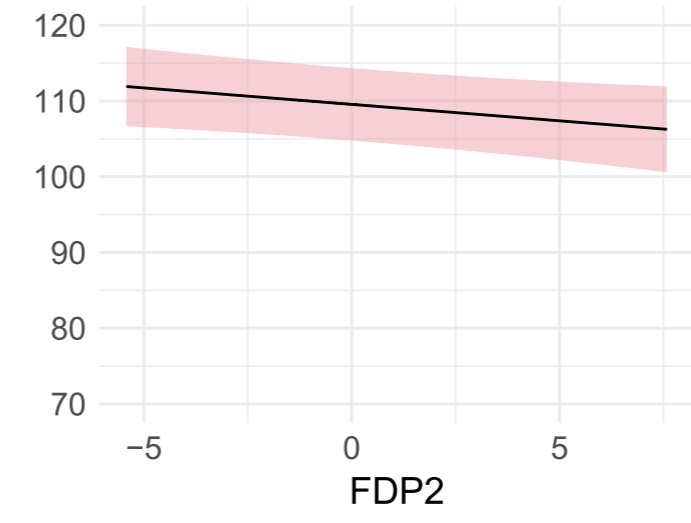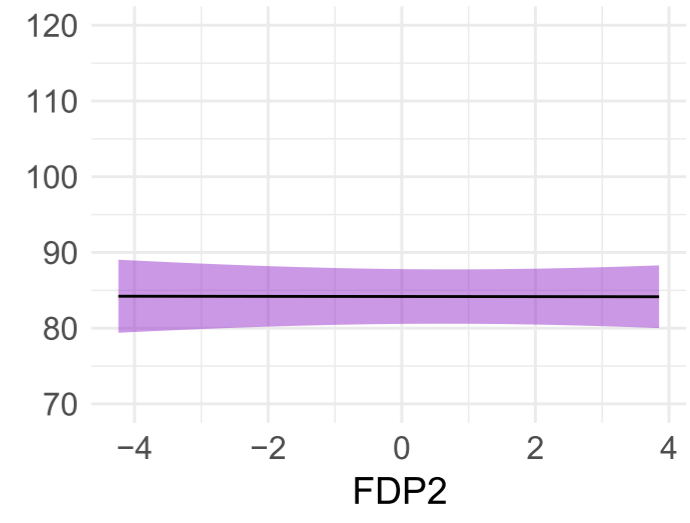

Source: https://medrxiv.org/content/medrxiv/early/2024/07/18/2024.07.18.24310620.full.pdf
